# Supplementary material for: Neuroprotective Effects of Red Ginseng Saponins in Scopolamine-Treated Rats and Activity Screening Based on Pharmacokinetics
Source: PubMed Central journal article supplement (PMC6600263; doi:10.3390/molecules24112136), 2019-06-06
Supplement: molecules-24-02136-s001.pdf [file molecules-24-02136-s001.pdf]

### Validation of LC/MS-MS method

The stock solutions of 16 standards were prepared in methanol. The working solutions of the analytes were prepared by diluting stock solutions with methanol and then blank rat plasma, so that the calibration standards were in the concentrations of 640, 320, 160, 80, 20, 5, 1.25 ng/mL for Rg1, Rf and Rh1; 1280, 640, 320, 160, 40, 10, 2.5 ng/mL for Rb1, Rb2, Rd and Rh3; 128, 64, 32, 16, 4, 1, 0.5 ng/mL for Re and Rg3; 768, 384, 192, 96, 24, 6, 1.5 ng/mL for Rc; 2560, 1280, 640, 320, 80, 20, 5 ng/mL for Rh2; 640, 320, 160, 80, 40, 20, 5 ng/mL for Rh4 and Rk1; 1280, 640, 320, 160, 80, 40, 10 ng/mL for Rg5; 320, 160, 80, 40, 20, 10, 2.5 ng/mL for Rk3; 128, 64, 32, 16, 8, 4, 2 ng/mL for Rg2. The IS solution was prepared and diluted to 1 g/mL with methanol. All solutions obtained were stored at 5 °C.

**Table S1.** Regression data and LLOQ of the analytes determined (n = 6).

| Composition | Linear Regression Equation | R <sup>2</sup> | Linear Range (ng/mL) | LLOQ (ng/mL) |
|-------------|----------------------------|----------------|----------------------|--------------|
| Rg1         | Y=0.112x+0.05              | 0.998          | 1.25-640             | 1.0          |
| Re          | Y=0.021x+0.22              | 0.999          | 1-256                | 1.0          |
| Rf          | Y=0.299x+0.06              | 0.995          | 1.25-640             | 1.0          |
| Rb1         | Y=0.114x+0.12              | 0.999          | 2.5-1280             | 1.0          |
| Rg2         | Y=0.023x+0.11              | 0.997          | 2-128                | 1.0          |
| Rh1         | Y=0.014x-0.12              | 0.998          | 1.25-640             | 1.0          |
| Rc          | Y=0.004x+0.02              | 0.992          | 1.5-768              | 1.0          |
| Rb2         | Y=0.213x+0.01              | 0.998          | 2.5-1280             | 2.0          |
| Rd          | Y=0.121x+0.12              | 0.993          | 2.5-1280             | 2.0          |
| Rg3         | Y=0.092x+0.03              | 0.994          | 0.5-256              | 1.5          |
| Rk1         | Y=0.014x+0.02              | 0.992          | 5-640                | 2.5          |
| Rg5         | Y=0.022x+0.14              | 0.997          | 5-1280               | 1.0          |
| Rh4         | Y=0.024x-0.13              | 0.995          | 5-640                | 1.5          |
| Rk3         | Y=0.012x+0.03              | 0.996          | 2.5-320              | 2.0          |
| Rh2         | Y=0.024x-0.02              | 0.995          | 5-2560               | 1.0          |
| Rh3         | Y=0.014x+0.01              | 0.996          | 2.5-1280             | 1.0          |

**Table S2.** Accuracy and precision of the analytes in blank plasma.

| Com. Spiked<br>(ng/mL) | Intra-Day (n = 5) |                   | Inter-Day (n = 5) |                   |     |
|------------------------|-------------------|-------------------|-------------------|-------------------|-----|
|                        | Accuracy<br>(%)   | Precision<br>RSD% | Accuracy<br>(%)   | Precision<br>RSD% |     |
| <b>Rg1</b>             | 640               | 101.1             | 7.2               | 102.1             | 3.5 |
|                        | 80                | 98.5              | 4.5               | 89.6              | 5.6 |
|                        | 1.25              | 102.3             | 5.6               | 96.5              | 4.5 |
| Re                     | 128               | 85.3              | 4.3               | 101.3             | 5.5 |
|                        | 16                | 89.6              | 5.8               | 102.3             | 4.6 |
|                        | 0.5               | 91.2              | 7.6               | 100.3             | 3.6 |
| Rf                     | 640               | 96.2              | 8.1               | 85.8              | 4.7 |
|                        | 80                | 93.2              | 6.5               | 89.3              | 5.4 |
|                        | 1.25              | 94.5              | 4.9               | 98.6              | 4.6 |
| Rb1                    | 1280              | 102.6             | 5.5               | 91.2              | 4.9 |
|                        | 160               | 101.3             | 6.9               | 90.2              | 7.4 |
|                        | 2.5               | 98.6              | 5.8               | 95.6              | 5.9 |
| Rg2                    | 128               | 92.4              | 4.8               | 87.5              | 5.4 |
|                        | 16                | 98.3              | 3.2               | 89.6              | 4.6 |
|                        | 2                 | 89.3              | 5.6               | 89.7              | 5.6 |
| Rh1                    | 640               | 95.6              | 7.5               | 96.2              | 2.2 |
|                        | 80                | 96.3              | 8.7               | 99.6              | 3.5 |
|                        | 1.25              | 86.4              | 5.6               | 98.5              | 4.6 |
| Rc                     | 768               | 93.3              | 4.8               | 99.5              | 2.3 |
|                        | 96                | 96.5              | 6.5               | 102.3             | 5.9 |
|                        | 1.5               | 98.6              | 4.5               | 101.3             | 5.6 |
| Rb2                    | 1280              | 95.2              | 8.4               | 101.5             | 6.5 |
|                        | 160               | 104.3             | 7.4               | 100.2             | 6.1 |
|                        | 2.5               | 102.3             | 5.9               | 99.6              | 3.5 |
| Rd                     | 1280              | 83.1              | 4.8               | 105.3             | 5.5 |
|                        | 160               | 93.2              | 3.6               | 89.6              | 4.9 |
|                        | 2.5               | 89.4              | 5.6               | 88.3              | 7.1 |
| Rg3                    | 128               | 99.6              | 3.7               | 88.6              | 3.2 |
|                        | 16                | 86.3              | 7.8               | 94.2              | 4.6 |
|                        | 0.5               | 87.6              | 5.9               | 99.5              | 5.8 |
| Rk1                    | 640               | 86.5              | 6.9               | 104.6             | 4.6 |
|                        | 80                | 96.3              | 6.9               | 102.5             | 4.5 |
|                        | 5                 | 96.5              | 7.4               | 98.5              | 5.6 |
| Rg5                    | 1280              | 101.2             | 5.1               | 95.7              | 3.8 |
|                        | 160               | 103.5             | 4.2               | 99.7              | 2.3 |
|                        | 5                 | 98.5              | 3.2               | 98.5              | 3.8 |
| Rh4                    | 640               | 92.2              | 6.2               | 104.1             | 7.5 |
|                        | 80                | 90.9              | 5.4               | 102.3             | 6.5 |
|                        | 5                 | 95.4              | 3.2               | 100.4             | 5.4 |
| Rk3                    | 320               | 83.2              | 7.3               | 82.9              | 4.6 |
|                        | 40                | 85.6              | 5.8               | 91.2              | 3.5 |
|                        | 2.5               | 89.7              | 7.6               | 89.6              | 4.5 |
| Rh2                    | 2560              | 83.3              | 5.5               | 84.3              | 5.3 |
|                        | 320               | 79.9              | 4.6               | 88.6              | 5.1 |
|                        | 5                 | 85.3              | 5.9               | 87.5              | 4.1 |
| Rh3                    | 640               | 98.5              | 3.2               | 98.5              | 5.8 |
|                        | 80                | 93.2              | 5.2               | 104.5             | 7.5 |
|                        | 2.5               | 91.9              | 5.1               | 101.3             | 7.8 |

**Table S3.** Extraction recovery of the analytes in rat plasma (n = 3).

| Com. | Spiked<br>(ug/mL) | Extraction<br>Recovery<br>(%) | RSD<br>(%) |
|------|-------------------|-------------------------------|------------|
| Rg1  | 640               | 83.5                          | 8.3        |
|      | 80                | 84.2                          | 6.3        |
|      | 1.25              | 84.2                          | 8.6        |
| Re   | 128               | 83.8                          | 11.7       |
|      | 16                | 88.1                          | 7.8        |
|      | 0.5               | 81.3                          | 9.1        |
| Rf   | 640               | 86.7                          | 6.4        |
|      | 80                | 89.4                          | 9.8        |
|      | 1.25              | 81.2                          | 7.3        |
| Rb1  | 1280              | 83.1                          | 7.2        |
|      | 160               | 81.8                          | 9.6        |
|      | 2.5               | 84.6                          | 8.8        |
| Rg2  | 128               | 83.4                          | 4.5        |
|      | 16                | 79.9                          | 8.6        |
|      | 2                 | 85.5                          | 10.2       |
| Rh1  | 640               | 86.3                          | 9.2        |
|      | 80                | 79.2                          | 11.4       |
|      | 1.25              | 83.5                          | 5.6        |
| Rc   | 768               | 87.1                          | 9.3        |
|      | 96                | 76.5                          | 8.2        |
|      | 1.5               | 84.3                          | 7.4        |
| Rb2  | 1280              | 88.5                          | 8.3        |
|      | 160               | 84.2                          | 6.3        |
|      | 2.5               | 89.2                          | 8.6        |
| Rd   | 1280              | 83.7                          | 10.8       |
|      | 160               | 89.1                          | 7.8        |
|      | 2.5               | 83.5                          | 9.4        |
| Rg3  | 128               | 86.7                          | 6.4        |
|      | 16                | 89.4                          | 9.1        |
|      | 0.5               | 86.2                          | 8.3        |
| RK1  | 640               | 83.1                          | 7.3        |
|      | 80                | 89.8                          | 7.6        |
|      | 5                 | 84.6                          | 8.8        |
| Rg5  | 1280              | 84.7                          | 9.5        |
|      | 160               | 79.9                          | 8.6        |
|      | 5                 | 85.7                          | 7.2        |
| Rh4  | 640               | 86.3                          | 9.2        |
|      | 80                | 79.7                          | 10.4       |
|      | 5                 | 83.5                          | 7.6        |
| Rk3  | 320               | 89.1                          | 9.3        |
|      | 40                | 76.5                          | 9.2        |
|      | 2.5               | 83.6                          | 7.4        |
| Rh2  | 2560              | 86.3                          | 10.2       |
|      | 320               | 89.1                          | 8.4        |
|      | 5                 | 87.9                          | 5.6        |
| Rh3  | 640               | 87.9                          | 7.3        |
|      | 80                | 77.5                          | 9.2        |
|      | 2.5               | 88.3                          | 7.9        |

**Table S4.** The stability of the analytes under different conditions.

| Com. | Spiked<br>(ug/mL) | Accuracy (mean ± S.D.%) |                        |                          |                               |
|------|-------------------|-------------------------|------------------------|--------------------------|-------------------------------|
|      |                   | Short-Term<br>Stability | Long-Term<br>Stability | Freeze-Thaw<br>Stability | Post-Preparative<br>Stability |
| Rg1  | 640               | 101.0±6.3               | 102.5±8.1              | 105.1±3.5                | 94.6±6.4                      |
|      | 80                | 92.2±7.1                | 102.1±9.2              | 105.0±8.2                | 105.1±6.2                     |
|      | 1.25              | 93.1±7.5                | 93.6±5.6               | 95.3±4.0                 | 94.4±7.4                      |
| Re   | 128               | 102.2±9.1               | 94.6±4.2               | 95.3±6.5                 | 94.5±7.5                      |
|      | 16                | 93.4±4.3                | 98.7±5.2               | 96.5±7.6                 | 95.5±6.5                      |
|      | 0.25              | 92.6±4.2                | 93.2±7.4               | 99.0±7.6                 | 92.8±6.5                      |
| Rf   | 640               | 92.3±4.3                | 94.6±8.7               | 92.5±6.7                 | 108.8±7.8                     |
|      | 80                | 95.6±5.2                | 101.3±9.6              | 105.6±6.5                | 96.8±8.8                      |
|      | 1.25              | 105.3±4.0               | 101.5±2.7              | 106.3±5.4                | 96.1±8.1                      |
| Rb1  | 1280              | 90.3±5.3                | 96.6±7.7               | 96.2±8.4                 | 94.1±4.2                      |
|      | 160               | 94.5±5.5                | 107.6±6.8              | 103.3±6.0                | 102.2±7.2                     |
|      | 2.5               | 94.4±7.9                | 97.9±8.7               | 94.5±8.4                 | 94.2±8.2                      |
| Rg2  | 128               | 93.2±2.4                | 102.9±5.3              | 104.2±3.4                | 103.3±4.3                     |
|      | 16                | 102.4±3.2               | 93.7±7.7               | 93.3±9.3                 | 95.6±7.3                      |
|      | 1                 | 95.3±8.7                | 91.3±7.6               | 95.3±6.6                 | 97.2±7.9                      |
| Rh1  | 640               | 102.4±5.1               | 103.5±8.4              | 108.5±6.3                | 102.4±4.4                     |
|      | 80                | 101.1±6.0               | 108.1±6.7              | 103.2±8.1                | 94.8±7.8                      |
|      | 1.25              | 105.0±5.1               | 102.0±8.2              | 103.7±7.0                | 95.4±8.8                      |
| Rc   | 768               | 95.2±4.4                | 93.2±5.2               | 92.3±8.3                 | 104.7±7.8                     |
|      | 96                | 97.6±2.7                | 105.2±9.4              | 103.5±5.5                | 104.4±5.8                     |
|      | 1.5               | 94.2±4.7                | 102.8±4.2              | 100.3±7.3                | 92.9±3.8                      |
| Rb2  | 1280              | 101.0±6.3               | 102.5±8.1              | 105.1±3.5                | 94.6±6.4                      |
|      | 160               | 92.2±7.1                | 102.1±9.2              | 105.0±8.2                | 105.1±6.2                     |
|      | 2.5               | 93.1±7.5                | 93.6±5.6               | 95.3±4.0                 | 94.4±7.4                      |
| Rd   | 1280              | 102.2±9.1               | 94.6±4.2               | 95.3±6.5                 | 94.5±7.5                      |
|      | 160               | 93.4±4.3                | 98.7±5.2               | 96.5±7.6                 | 95.5±6.5                      |
|      | 2.5               | 92.6±4.2                | 93.2±7.4               | 99.0±7.6                 | 92.8±6.5                      |
| Rg3  | 128               | 92.3±4.3                | 94.6±8.7               | 92.5±6.7                 | 108.8±7.8                     |
|      | 16                | 95.6±5.2                | 101.3±9.6              | 105.6±6.5                | 96.8±8.8                      |
|      | 0.5               | 105.3±4.0               | 101.5±2.7              | 106.3±5.4                | 96.1±8.1                      |
| RK1  | 640               | 90.3±5.3                | 96.6±7.7               | 96.2±8.4                 | 94.1±4.2                      |
|      | 80                | 94.5±5.5                | 107.6±6.8              | 103.3±6.0                | 102.2±7.2                     |
|      | 5                 | 94.4±7.9                | 97.9±8.7               | 94.5±8.4                 | 94.2±8.2                      |
| Rg5  | 1280              | 93.2±2.4                | 102.9±5.3              | 104.2±3.4                | 103.3±4.3                     |
|      | 160               | 102.4±3.2               | 93.7±7.7               | 93.3±9.3                 | 95.6±7.3                      |
|      | 5                 | 95.3±8.7                | 91.3±7.6               | 95.3±6.6                 | 97.2±7.9                      |
| Rh4  | 640               | 102.4±5.1               | 103.5±8.4              | 108.5±6.3                | 102.4±4.4                     |
|      | 80                | 101.1±6.0               | 108.1±6.7              | 103.2±8.1                | 94.8±7.8                      |
|      | 5                 | 105.0±5.1               | 102.0±8.2              | 103.7±7.0                | 95.4±8.8                      |
| Rk3  | 320               | 95.2±4.4                | 93.2±5.2               | 92.3±8.3                 | 104.7±7.8                     |
|      | 40                | 97.6±2.7                | 105.2±9.4              | 103.5±5.5                | 104.4±5.8                     |
|      | 2.5               | 94.2±4.7                | 102.8±4.2              | 100.3±7.3                | 92.9±3.8                      |
| Rh2  | 2560              | 102.4±5.1               | 103.5±8.4              | 108.5±6.3                | 102.4±4.4                     |
|      | 320               | 101.1±6.0               | 108.1±6.7              | 103.2±8.1                | 94.8±7.8                      |
|      | 5                 | 105.0±5.1               | 102.0±8.2              | 103.7±7.0                | 95.4±8.8                      |
| Rh3  | 640               | 95.2±4.4                | 93.2±5.2               | 92.3±8.3                 | 104.7±7.8                     |
|      | 80                | 97.6±2.7                | 105.2±9.4              | 103.5±5.5                | 104.4±5.8                     |
|      | 2.5               | 94.2±4.7                | 102.8±4.2              | 100.3±7.3                | 92.9±3.8                      |
